# Supplementary material for: Transition metal (Ni, Fe, and Cu) hydroxides enhanced α-Fe2O3photoanode-based photofuel cell
Source: Royal Society of Chemistry journal article supplement (doi:10.1039/c4ra07498j), 2014-01-01
Supplement: c4ra07498j1.pdf [file c4ra07498j1.pdf]

## Electronic Supporting Information (ESI)

### **The Performance of $\alpha$ -Fe<sub>2</sub>O<sub>3</sub> Photoanode-based Photofuel Cell Enhanced by Transition Metals (Ni, Fe, and Cu) Hydroxides**

Ruifeng Chong,<sup>a</sup> Zhiliang Wang,<sup>a</sup> Jun Li, Hongxian Han, Jingying Shi and Can Li\*

#### **Affiliations:**

State Key Laboratory of Catalysis, Dalian Institute of Chemical Physics, Chinese  
Academy of Sciences, Dalian National Laboratory for Clean Energy, 457 Zhongshan  
Road, Dalian, 116023, China.

<sup>a</sup>These authors contributed equally to this work.

\*To whom all correspondence should be addressed. Email: [canli@dicp.ac.cn](mailto:canli@dicp.ac.cn)

<http://www.canli.dicp.ac.cn>

Tel: 86-411-84379070 Fax: 86-411-84694447

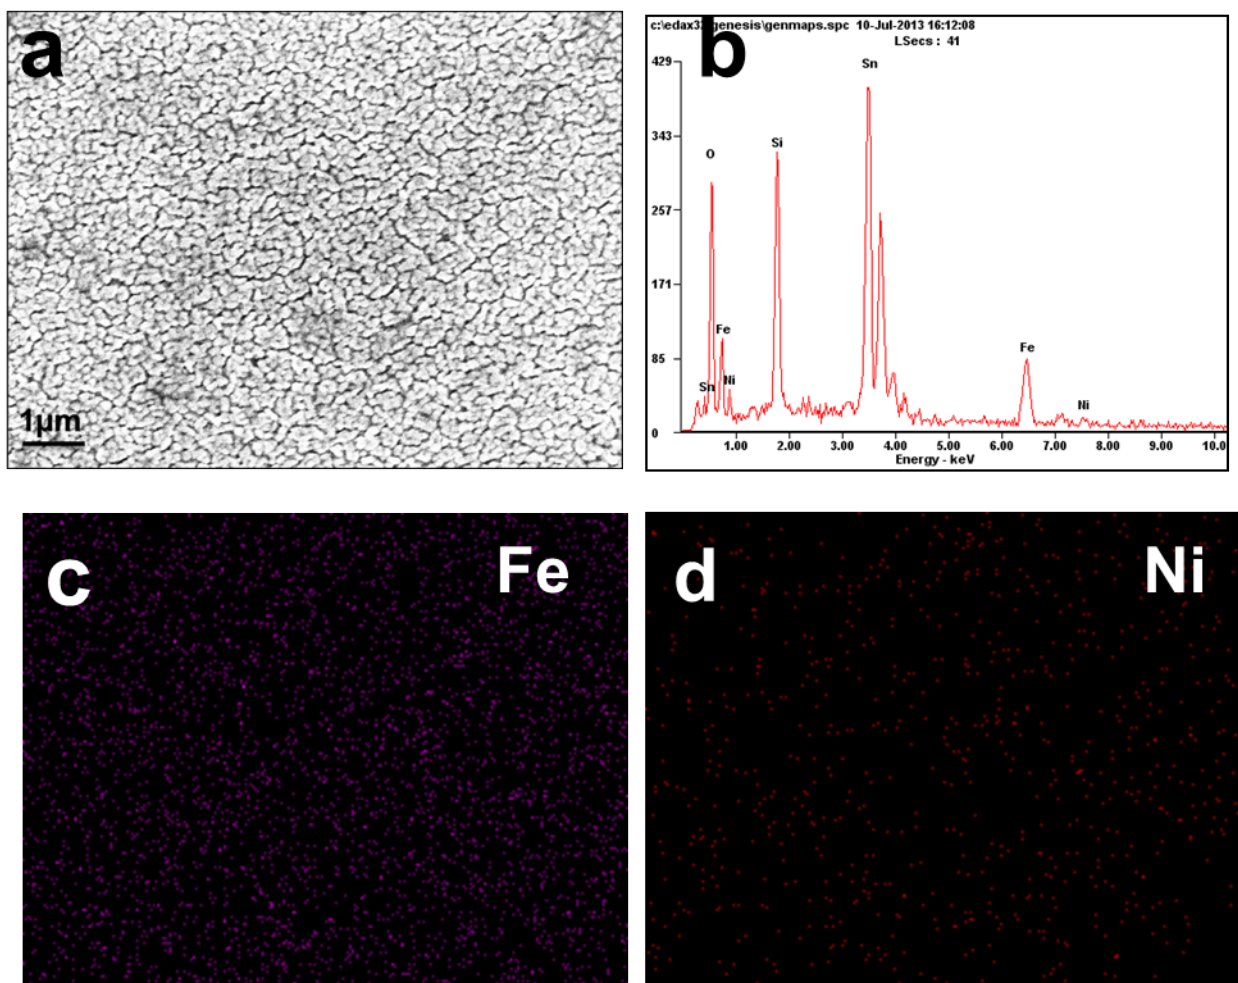

**Fig. S1** (a) SEM image of  $\text{Ni(OH)}_2/\text{Fe}_2\text{O}_3$  on a FTO glass substrate. (b) EDS spectrum collected for the  $\text{Ni(OH)}_2$  modified hematite film. Elemental mapping of (c) Fe and (d) Ni.

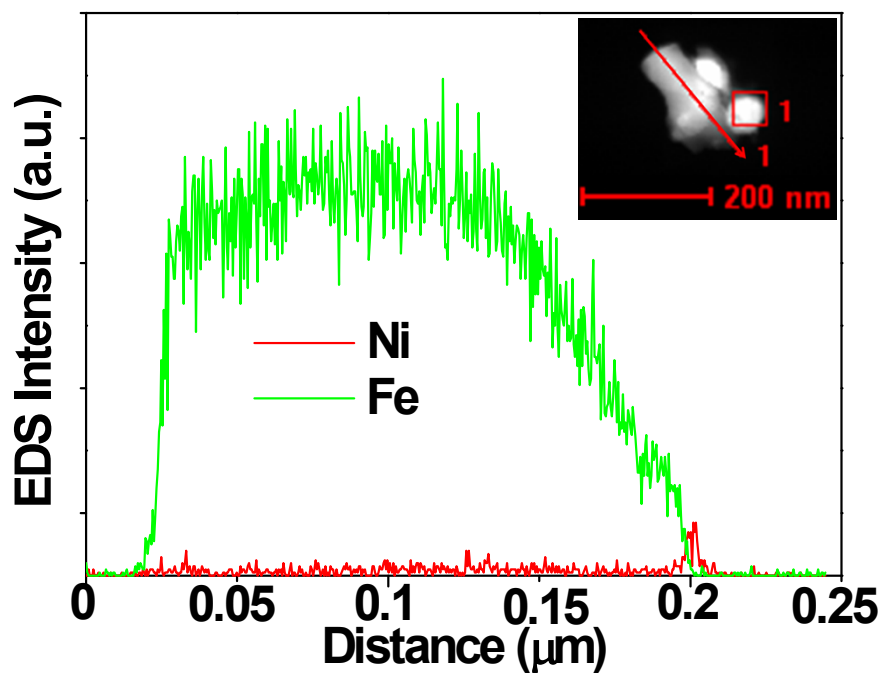

**Fig. S2** EDS linescan profile of Fe (green line) and Ni (red line) acquired across the  $\text{Fe}_2\text{O}_3$  nanorod. Position and the scan direction are depicted by the red arrow in the dark-field STEM image.

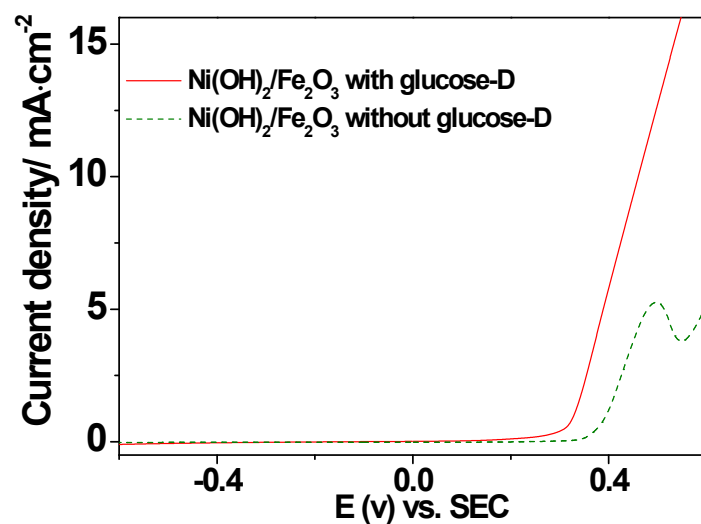

**Fig. S3** LSV curves collected for  $\text{Ni}(\text{OH})_2/\text{Fe}_2\text{O}_3$  photoanode at a scan rate of  $50 \text{ mV s}^{-1}$  in a 1 M KOH aqueous solution with glucose (solid line) and without glucose(dashed line).

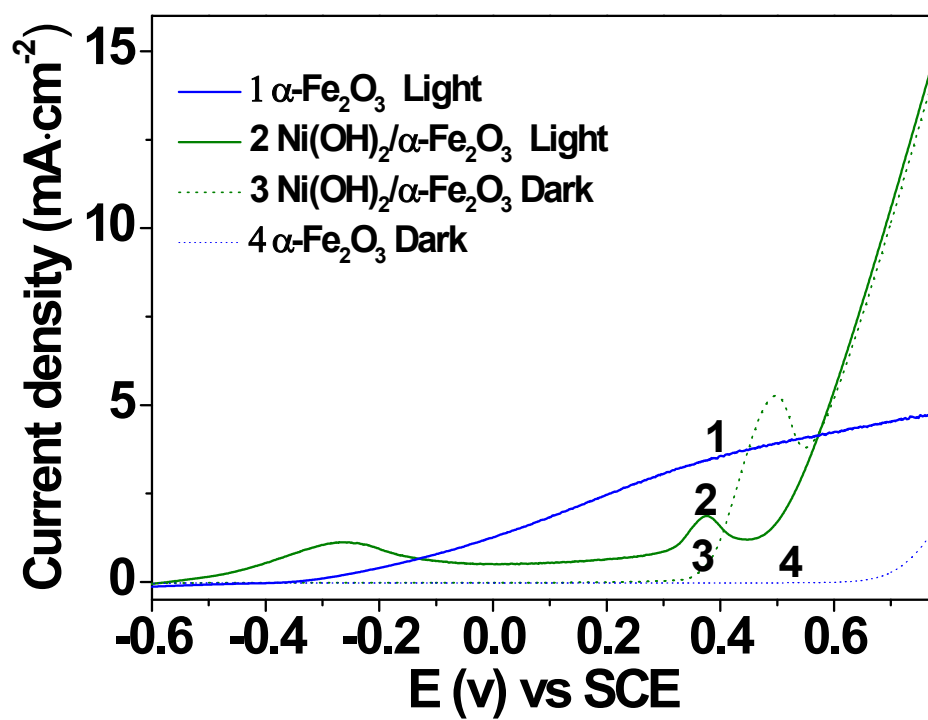

**Fig. S4** LSV curves of  $\alpha\text{-Fe}_2\text{O}_3$  and  $\text{Ni(OH)}_2/\alpha\text{-Fe}_2\text{O}_3$  photoanodes in a  $1\text{ mol L}^{-1}$  KOH solution; Light source: 300 W Xe lamp; Scanning rate:  $20\text{ mV s}^{-1}$ .

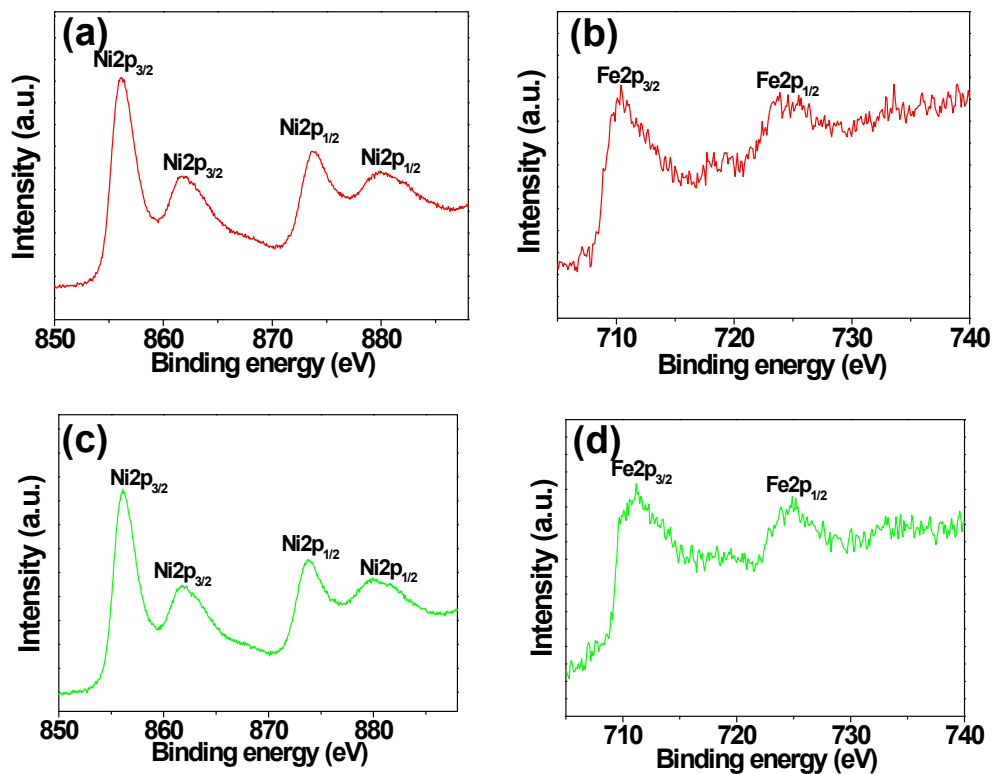

**Fig. S5** XPS spectra (a) and (b) fresh Ni(OH)<sub>2</sub>/α-Fe<sub>2</sub>O<sub>3</sub> photoanode; (c) and (d) Ni(OH)<sub>2</sub>/α-Fe<sub>2</sub>O<sub>3</sub> after 4 h of amperometric I-t test.

The XPS (X-ray Photoelectron Spectroscopy) results of Ni(OH)<sub>2</sub>/α-Fe<sub>2</sub>O<sub>3</sub> electrode show weak peaks of Fe 2p<sub>3/2</sub> (710.8 eV) and 2p<sub>1/2</sub> (724.6 eV) (Fig. S3A, ESI†), which are in good agreement with documented values of Fe<sup>3+</sup> species. Fig. S3B shows that a binding energy of 856.0 eV and 873.6 eV with intense satellite signals are assigned to Ni 2p<sub>3/2</sub> and 2p<sub>1/2</sub> in Ni(OH)<sub>2</sub>, respectively.

**Table S1** The intermediates from glucose in the I-t test with Ni(OH)<sub>2</sub>/α-Fe<sub>2</sub>O<sub>3</sub> photoanode.

| Consumed<br>of Glucose<br>(mmol L <sup>-1</sup> ) | The products (mmol L <sup>-1</sup> ) |                        |                             |                             |                           |                        | C-balance<br>(%) |
|---------------------------------------------------|--------------------------------------|------------------------|-----------------------------|-----------------------------|---------------------------|------------------------|------------------|
|                                                   | Arabi-<br>nose<br>(C5)               | Eryth-<br>rose<br>(C4) | Glycer-<br>aldehyde<br>(C3) | Glycol-<br>aldehyde<br>(C2) | glycollic<br>acid<br>(C2) | Formic<br>acid<br>(C1) |                  |
| 18.9                                              | 6.07                                 | 0.61                   | 1.72                        | 1.76                        | 11.9                      | 15.4                   | 71.1             |

Reaction condition: Ni(OH)<sub>2</sub>/α-Fe<sub>2</sub>O<sub>3</sub> photoanode at 0 V vs. SCE in a 1 mol L<sup>-1</sup> KOH aqueous solution with 0.025 mol L<sup>-1</sup> glucose. Light source: 300 W Xe lamp. Reaction time, 6 h. The area of Fe<sub>2</sub>O<sub>3</sub> film is 1.58 cm<sup>2</sup>.

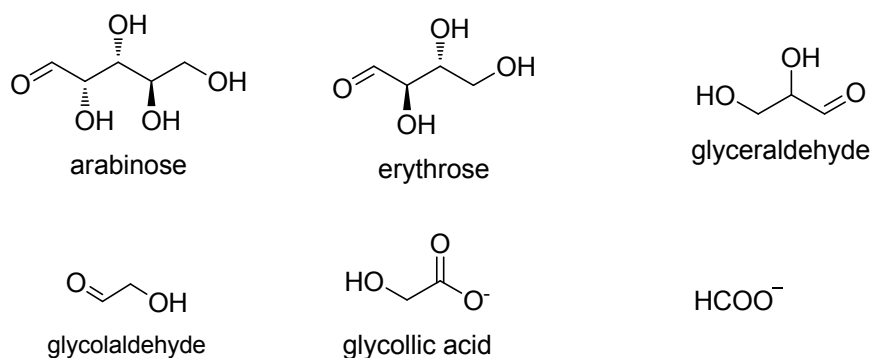

**Fig. S6** The molecular structures of the intermediates from glucose.
